# Supplementary material
Source: PubMed Central journal article supplement (PMC10372757)
Supplement: jamadermatol-e232227-s001.pdf [file jamadermatol-e232227-s001.pdf]

## Supplemental Online Content

Mintoff D, Pace NP, Borg I. *NCSTN* in-frame deletions in Maltese patients with hidradenitis suppurativa. *JAMA Dermatol*. Published online July 26, 2023.  
doi:10.1001/jamadermatol.2023.2227

### **eMethods.**

**eTable 1.** Summary sequencing metrics for *NCSTN* NM\_015331 and *NCSTN* exon 6 in the control population

**eFigure 1.** Representative RFLP results

**eFigure 2.** Sanger traces

**eFigure 3.** The *NCSTN* (NM\_015331.3):c.671\_682delTCATCAGCACTG variant

**eTable 2.** A summary of studies investigating the prevalence of GSC variation in cohorts

**eReferences.**

This supplemental material has been provided by the authors to give readers additional information about their work.

## **eMethods**

### ***DNA extraction and PCR***

Genomic DNA was isolated from peripheral blood leukocytes using a QIAmp® DNA Blood Mini Kit (Qiagen Inc, CA, USA) according to the manufacturer's instructions. DNA concentrations were measured using a NanoDrop® 2000 Spectrophotometer (Thermo Scientific, USA) and concentration adjusted to 40 ng/μL.

A 290 bp region flanking the variant of interest within exon 6 of *NCSTN* was amplified using the following primers designed using Primer3<sup>1</sup> (forward: CAG CAC CAA CCT TCC CAC TAT, reverse: CCC TCT GCC CCT TAT TCC AT). PCR reactions were set up in 50μL volumes, containing 40ng of genomic DNA, 10μM of each forward and reverse primer, 25μL of PCR BIO TaqMix® Red (PCR Biosystems, USA) and 22μL of molecular biology grade water. Amplification was performed using the following cycling conditions: 95°C for 5 minutes, followed by 30 cycles of 30 seconds at 95°C, 40 seconds at 64°C, 40 seconds at 72 °C then at 72°C for 10 minutes. Following PCR amplification and size verification by 2% agarose gel electrophoresis, amplicons underwent spin column purification with a MinElute Reaction Cleanup Kit (Qiagen) and bi-directional Sanger sequencing using a dye terminator cycle sequencing kit (ABI PRISM Big Dye Terminator v2.0) and an ABI 3100 sequencer (Applied Biosystems).

### ***Targeted variant analysis RFLP and Sanger Sequencing***

We screened the HS population for the *NCSTN* in frame deletion of interest by using the restriction enzyme BtsI v2 (New England BioLabs® Inc). The wild-type genotype is indicated by the presence of two fragments at 187 and 103bp. The deletion abolishes the restriction site for BtsI-v2, creating an undigested 290bp band.

The RFLP reaction was set up according to the manufacturer's recommendations using 5 Units of restriction enzyme and incubated at 37 degrees Celsius for 30 minutes. RFLP products were subsequently subjected to electrophoretic separation on 2% agarose till the restriction fragments could be adequately resolved to enable genotype calls to be made.

Variant genotypes detected by RFLP were confirmed by Sanger sequencing. Internal positive and negative controls were included with each assay. Representative results are shown in **eFigure 1 & 2** in the **Supplement**.

### ***Controls***

Briefly, exon enrichment for next generation sequencing was performed using the SureSelectXT All Exon V6 capture design (Agilent Technologies). Each individual exomic library was prepared from 300ng of DNA according to the manufacturer's protocols. The resulting libraries were sequenced in 150 bp paired-end reads on a NovaSeq®6000 sequencer (Illumina®, Inc.).

We used VarAft to explore on-target *NCSTN* sequencing depth and *NCSTN* exon 6 depth in the control reference population. Summary sequencing metrics are outlined in the table below.

|                        | Mean depth | SD Depth | Coverage 20X | Coverage 30X |
|------------------------|------------|----------|--------------|--------------|
| <b>NCSTN NM_015331</b> | 71.11      | 13.29    | 100          | 98.34        |
| <b>NCSTN exon 6</b>    | 68.33      | 10.3     | 100          | 97.63        |

**eTable 1:** Summary Sequencing metrics for NCSTN NM\_015331 and NCSTN exon 6 in the control population

### Assessing evolutionary conservation analysis

Multiple species amino acid sequence alignment of the NCSTN protein was performed using Clustal Omega (European Bioinformatics Institute, EMBL-EBI; <http://www.ebi.ac.uk/Tools/msa/clustalo/>). The following Uniprot identifiers were used: Q92542 (Human – *Homo sapiens*), A0A8D1I1Z1 (Pig – *Sus scrofa*), A0A2R9ATE9 (Pygmy chimpanzee – *Pan paniscus*) M1VPL1 (Dog – *Canis familiaris*), P57716 (Mouse – *Mus musculus*), Q5ZJH2 (Chicken - *Gallus gallus*). Sequence alignment quality was interpreted according to Blocks Substitution Matrix (BLOSUM62) score<sup>2</sup> and the results were visualized using Jalview 2.0.<sup>3</sup> The MetaDome webserver (<https://stuart.radboudumc.nl/metadome/>) was used to evaluate the regional mutation tolerance at each position in NCSTN protein.<sup>4</sup>

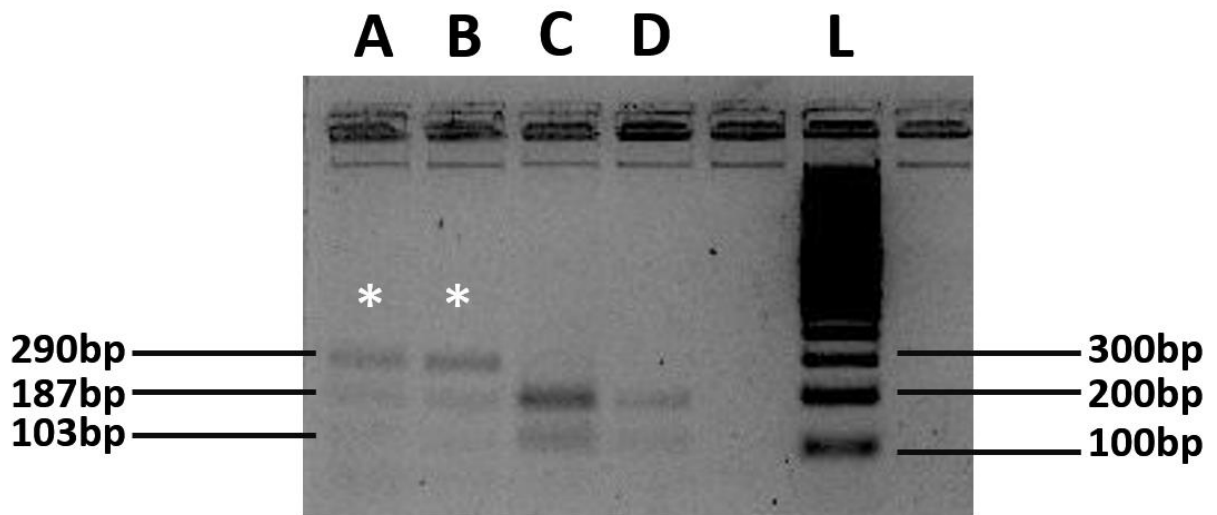

**eFigure1: Representative RFLP Results.**

Lanes 'A' to 'D' represent individual HS patients, Lane 'L' represents a 100bp ladder DNA marker. The arrows indicate the three restriction fragment bands at 290, 187 and 103bp. Lanes 'A' and 'B' (\*) signifying loss of the restriction site secondary to deletion in the heterozygous state. Lanes 'C' and 'D' show the two bands (at 187bp and 103bp). The deletion was not identified in these two patients.

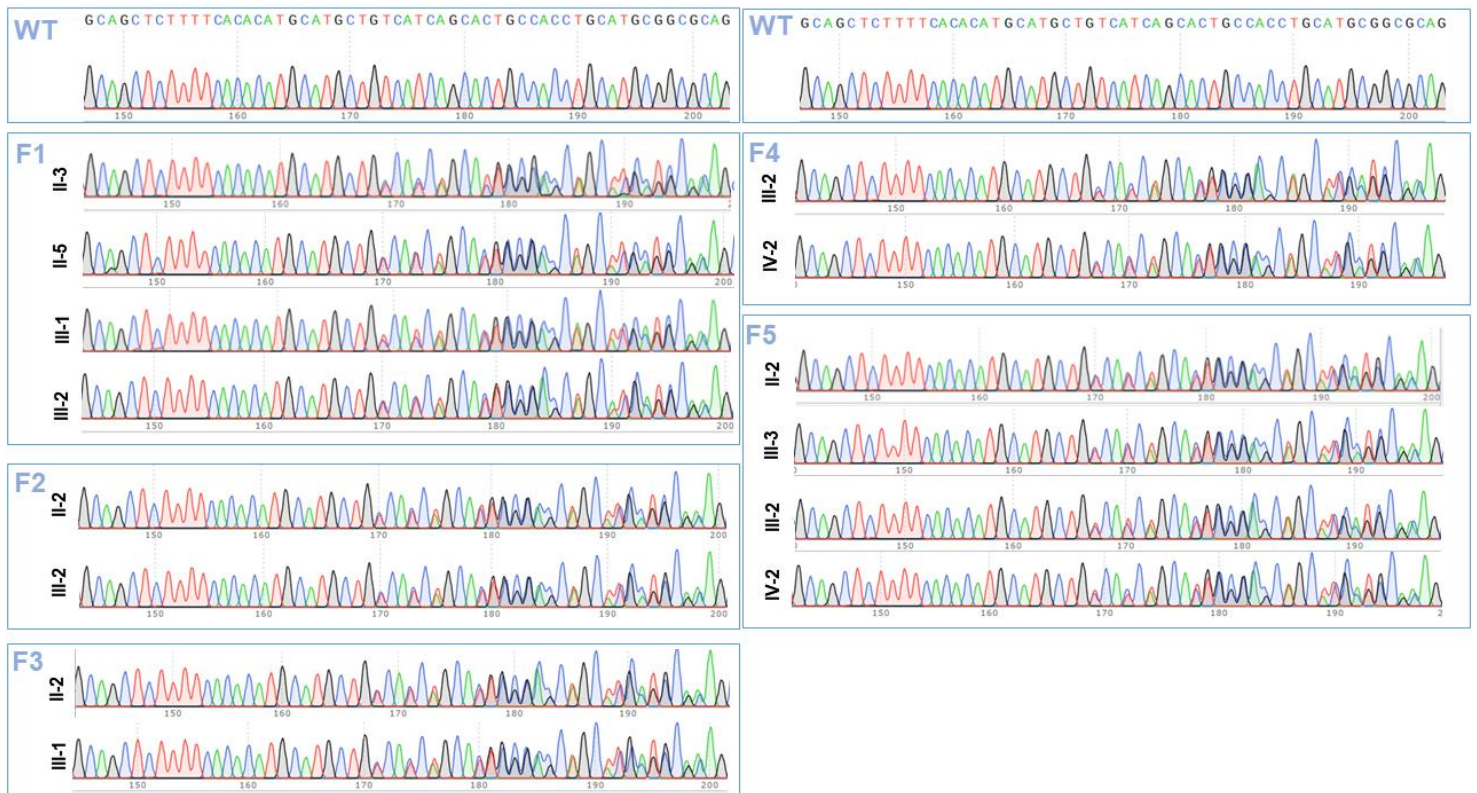

**eFigure 2: Sanger Traces**

Sanger traces of patients heterozygous for the *NCSTN*:c.671\_682del in Families (F) 1-5. Trace for wild type (WT) *NCSTN* are shown for reference.

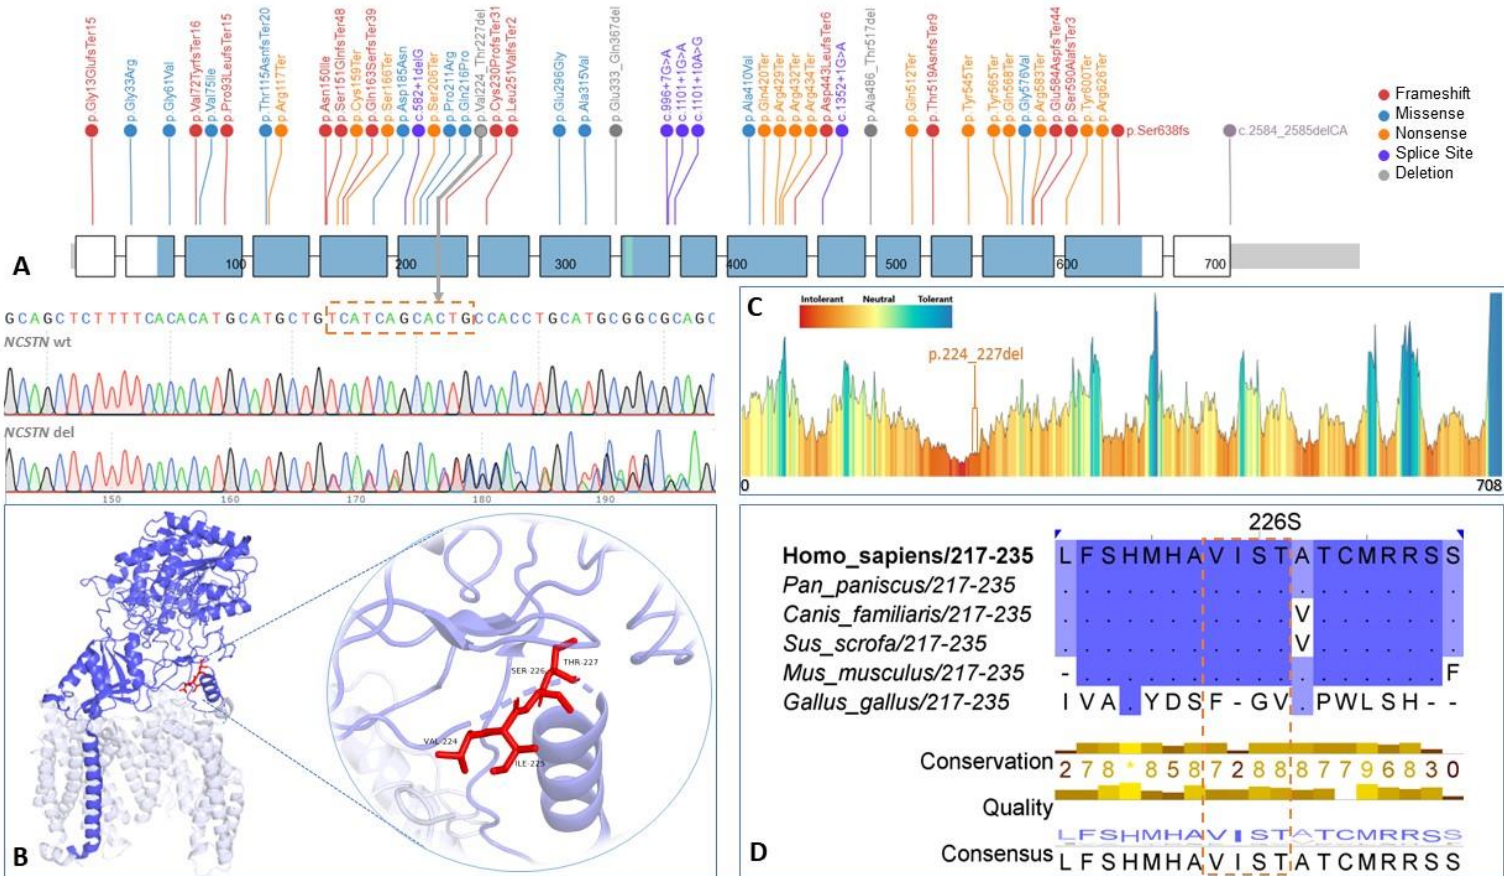

**Figure 3: The *NCSTN* (NM\_015331.3):c.671\_682delTCATCAGCACTG variant.**

(A) The spectrum of HS-associated *NCSTN* variants reported to date. The deletion described in this report is shown in the grey arrow. Sanger traces showing the control sequence (top trace) and the deletion (bottom trace). The superimposed traces represent chromatogram shift due to the heterozygous deletion displayed in the bottom trace but not in the control sequence. (B) The deletion results in loss of the four amino acids Val224, Ile225, Ser226, Thr227 in the extracellular domain of *NCSTN*. This variant lies in a region which is intolerant to variation (C) and which is highly conserved (D).

| Cohort                                                    | % of unrelated probands with pathogenic/LP/VUS <i>NCSTN</i> variation | <i>NCSTN</i> variant(s)                                             | Ethnic background                         | Reference                     |
|-----------------------------------------------------------|-----------------------------------------------------------------------|---------------------------------------------------------------------|-------------------------------------------|-------------------------------|
| Syndromic HS                                              | 20% (2/10)                                                            | c.1140_1141del (p.Asp381SerfsTer7)<br>c.482delA (p.Ile162TyrfsTer7) | Italian                                   | Marzano et al <sup>5</sup>    |
| Stand alone HS                                            | 0.03% (1/31)                                                          | c.38delG (p.Glu13GlufsTer15)                                        | German                                    | Vural et al <sup>6</sup>      |
| Stand alone HS                                            | 0.03% (2/59)                                                          | c.436+129A>G<br>c.582+1G>A                                          | Singaporean Chinese                       | Shen et al <sup>7</sup>       |
| Stand alone HS                                            | 0 (0/11)                                                              |                                                                     | Danish                                    | Theut Riis et al <sup>8</sup> |
| Stand alone HS, syndromic (8%) and Collision disease (3%) | 0.01% (2/169)                                                         | c.182G>T (p.Gly61Val)<br>c.1727G>T (p.Gly576Val)                    | European (63%), African (14%), Asian (2%) | Duchatelet et al <sup>9</sup> |
| Stand alone HS                                            | 0.02% (2/95)                                                          | c.349C>T (p.Arg117Ter)                                              | European                                  | Liu et al <sup>10</sup>       |
| Stand alone HS                                            | 0/20                                                                  |                                                                     | South Wales                               | Ingram et al <sup>11</sup>    |
| Stand alone HS                                            | 0.04% (2/48)                                                          | c.553G>A (p.Asp185Asn)<br>c.996+7G>A                                | Mixed ethnicity                           | Pink et al <sup>12</sup>      |

**eTable2: A summary of studies investigating the prevalence of GSC variation in cohorts.**

## eReferences ;

1. Untergasser A, Cutcutache I, Koressaar T, et al. Primer3--new capabilities and interfaces. *Nucleic Acids Res.* 2012;40(15):e115. doi:10.1093/nar/gks596
2. Henikoff S, Henikoff JG. Amino acid substitution matrices from protein blocks. *Proceedings of the National Academy of Sciences.* 1992;89(22):10915-10919. doi:10.1073/pnas.89.22.10915
3. Waterhouse AM, Procter JB, Martin DMA, Clamp M, Barton GJ. Jalview Version 2—a multiple sequence alignment editor and analysis workbench. *Bioinformatics.* 2009;25(9):1189-1191. doi:10.1093/bioinformatics/btp033
4. Wiel L, Baakman C, Gilissen D, Veltman JA, Vriend G, Gilissen C. MetaDome: Pathogenicity analysis of genetic variants through aggregation of homologous human protein domains. *Human Mutation.* 2019;40(8):1030-1038. doi:10.1002/humu.23798
5. Marzano AV, Genovese G, Moltrasio C, et al. Whole-Exome Sequencing in 10 Unrelated Patients with Syndromic Hidradenitis Suppurativa: A Preliminary Step for a Genotype-Phenotype Correlation. *Dermatology.* Published online January 14, 2022:1-10. doi:10.1159/000521263
6. Vural S, Baumgartner M, Lichtner P, et al. Investigation of gamma secretase gene complex mutations in German population with Hidradenitis suppurativa designate a complex polygenic heritage. *Journal of the European Academy of Dermatology and Venereology.* 2021;35(6):1386-1392. doi:10.1111/jdv.17163
7. Shen M, Yeoh XLA, Wang DY, Tey HL, Ren EC, Oon HH. Genetic variations in gamma-secretase and PSTPIP1 in hidradenitis suppurativa in Singaporean Chinese. *J Eur Acad Dermatol Venereol.* 2021;35(5):e348-e350. doi:10.1111/jdv.17125
8. Theut Riis P, Loft IC, Yazdanyar S, et al. Full exome sequencing of 11 families with Hidradenitis suppurativa. *J Eur Acad Dermatol Venereol.* Published online December 17, 2020. doi:10.1111/jdv.17095
9. Duchatelet S, Miskinyte S, Delage M, et al. Low Prevalence of GSC Gene Mutations in a Large Cohort of Predominantly Caucasian Patients with Hidradenitis Suppurativa. *J Invest Dermatol.* 2020;140(10):2085-2088.e14. doi:10.1016/j.jid.2019.10.025
10. Liu M, Davis JW, Idler KB, Mostafa NM, Okun MM, Waring JF. Genetic analysis of NCSTN for potential association with hidradenitis suppurativa in familial and nonfamilial patients. *Br J Dermatol.* 2016;175(2):414-416. doi:10.1111/bjd.14482
11. Ingram JR, Wood M, John B, Butler R, Anstey AV. Absence of pathogenic  $\gamma$ -secretase mutations in a South Wales cohort of familial and sporadic hidradenitis suppurativa (acne inversa). *Br J Dermatol.* 2013;168(4):874-876. doi:10.1111/bjd.12048
12. Pink AE, Simpson MA, Desai N, et al. Mutations in the  $\gamma$ -secretase genes NCSTN, PSENEN, and PSEN1 underlie rare forms of hidradenitis suppurativa (acne inversa). *J Invest Dermatol.* 2012;132(10):2459-2461. doi:10.1038/jid.2012.162
